# Supplementary material
Source: HighWire-hosted journal article supplement (https://bmjopen.bmj.com/content/14/12/e093177)
Supplement: inline-supplementary-material-1 [file inline-supplementary-material-1.pdf]

## The detailed search strategies for databases

### PubMed

Search command:

("Appendicitis"[MeSH] OR "acute appendicitis" OR "uncomplicated acute appendicitis" OR "simple appendicitis")

AND ("therapy" OR "treatment" OR "surgery" OR "antibiotic therapy" OR "non-operative treatment" OR "conservative management" OR "endoscopic retrograde appendicitis therapy" OR "ERAT")

AND ("Randomized Controlled Trial"[Publication Type])

### Web of science

Search command:

TS=("appendicitis" OR "acute appendicitis" OR "uncomplicated appendicitis")

AND TS=("therapy" OR "treatment" OR "surgery" OR "antibiotic therapy" OR "antibiotics" OR "conservative management" OR "non-operative treatment" OR "endoscopic retrograde appendicitis therapy" OR "ERAT")

AND TS=("randomized controlled trial" OR "randomised controlled trial" OR "RCT")

### EMBASE

Search command:

('appendicitis'/exp OR 'appendicitis':ti,ab OR 'acute appendicitis':ti,ab)

AND ('uncomplicated':ti,ab OR 'uncomplicated appendicitis':ti,ab)

AND ('therapy'/exp OR 'treatment':ti,ab OR 'surgery'/exp OR 'surgery':ti,ab OR 'antibiotic therapy'/exp OR 'antibiotics':ti,ab OR 'conservative management':ti,ab OR 'non operative treatment':ti,ab OR 'endoscopic retrograde appendicitis therapy':ti,ab OR 'ERAT':ti,ab)

AND ('randomized controlled trial'/exp OR 'randomized controlled trial':ti,ab OR 'randomised controlled trial':ti,ab OR 'RCT':ti,ab)

### China National Knowledge Infrastructure (CNKI)

Search command:

("急性阑尾炎" OR "无并发症急性阑尾炎")

AND ("治疗" OR "手术" OR "抗生素治疗" OR "保守治疗" OR "内镜逆行阑尾术" OR "ERAT")

AND ("随机对照试验")

### Cochrane Library

Search command:

("appendicitis" OR "acute appendicitis" OR "uncomplicated appendicitis")  
AND ("therapy" OR "treatment" OR "surgery" OR "antibiotic therapy" OR "antibiotics" OR  
"conservative management" OR "non-operative treatment" OR "endoscopic retrograde  
appendicitis therapy" OR "ERAT")  
AND ("randomized controlled trial" OR "randomised controlled trial" OR "RCT")
